# Supplementary material for: Mitochondrial Inhibition by Sodium Azide Induces Assembly of eIF2α Phosphorylation-Independent Stress Granules in Mammalian Cells
Source: MDPI journal article supplement (doi:10.3390/ijms23105600), 2022-05-17
Supplement: s1 [file s1]

# Supplementary files

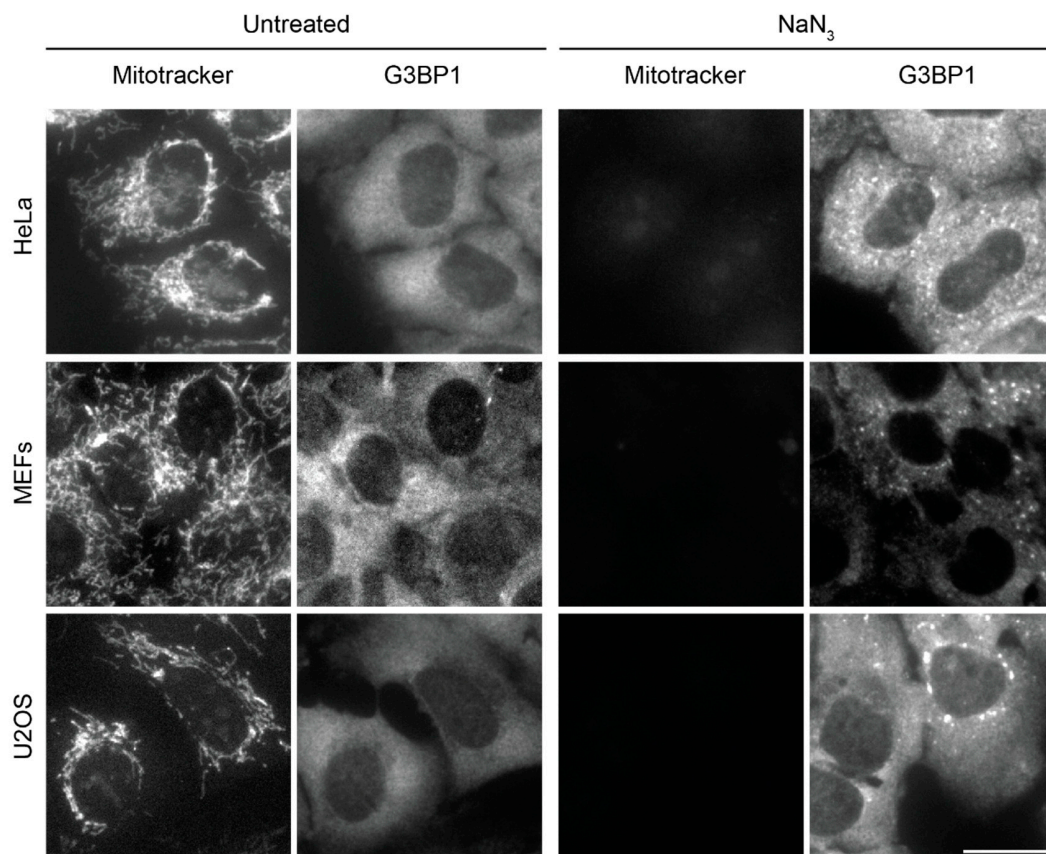

**Figure S1.** NaN<sub>3</sub> treatment leads to mitochondrial inhibition. HeLa, MEFs and U2Os cells were left untreated or treated with 0.5% v/v (76 mM) NaN<sub>3</sub> for 1h. 45 minutes before fixation, Mitotracker probe (CM-H<sub>2</sub>TMRos) was added to the culture medium. After fixation, cells were stained against G3BP1 and analyzed by microscopy. Scale bar = 20 μm.

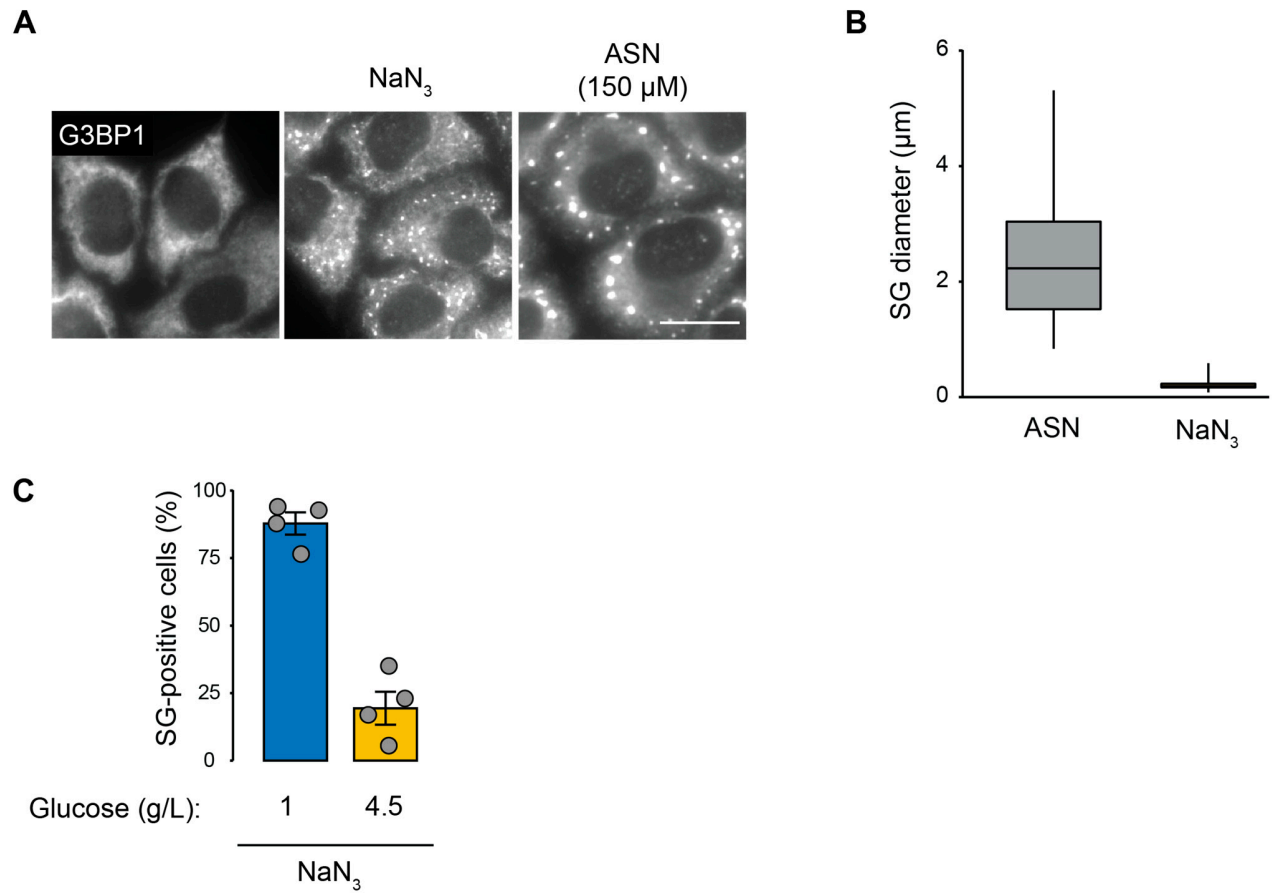

**Figure S2.**  $\text{NaN}_3$ -induced SGs are smaller than common SGs induced by ASN. **A**, HeLa cells were left untreated or treated with 150  $\mu\text{M}$  ASN for 1h or 76 mM  $\text{NaN}_3$  for 2h. Cells were fixed, stained against G3BP1 and analyzed by microscopy. Scale bar = 20  $\mu\text{m}$  **B**, Diameters of SGs in HeLa cells were measured using Fiji software. Results are presented as a boxplot. Line in the box refers to the median value. Data analysis is based on 202 measurements of SG diameter for each group. **C**, Quantification of SGs formed in HeLa cells treated with  $\text{NaN}_3$  in high (4.5 g/L) and low (1 g/L) glucose medium. The graph shows mean value  $\pm$  SD ( $n = 4$  independent experiments, approximately 100 cells were analyzed per experiment and condition).

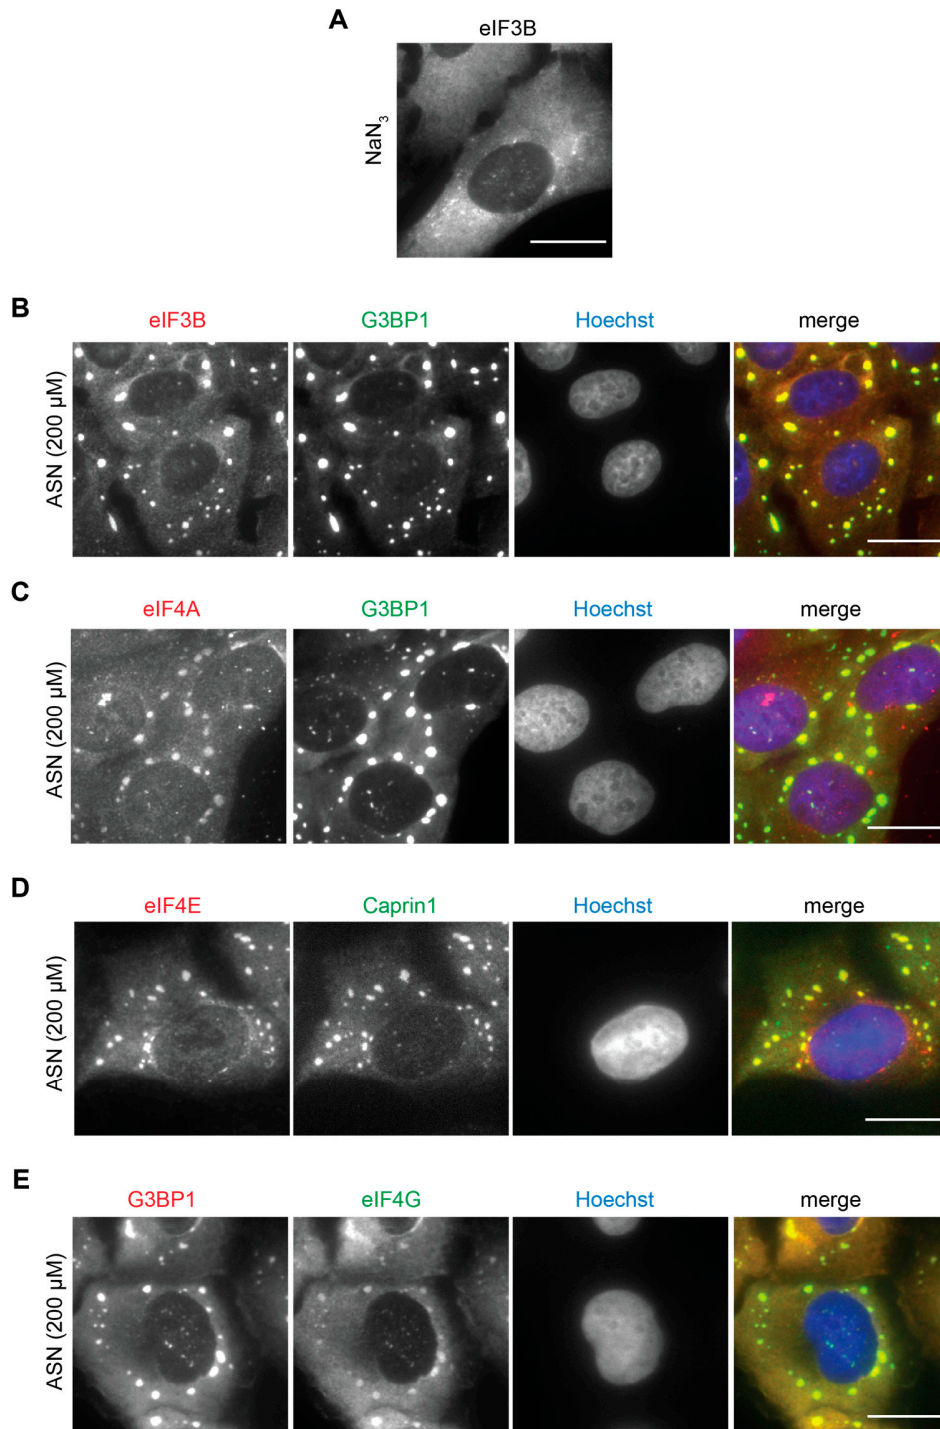

**Figure S3.** Characterization of NaN<sub>3</sub>- and ASN-induced SGs. **A**, Single immunostaining of eIF3B in NaN<sub>3</sub>-treated U2OS cells. Scale bar = 20 μm. **B**, U2OS were treated with ASN and immunostained against G3BP1 together with eIF3B. **C**, Co-immunostaining of eIF4A and G3BP1 in U2OS cells treated with NaN<sub>3</sub> (76 mM). Scale bar = 20 μm. **D**, Co-immunostaining of Caprin1 and eIF4E in U2OS cells treated with ASN. Scale bar = 20 μm. **E**, Co-immunostaining of eIF4G and G3BP1 in U2OS cells treated with NaN<sub>3</sub>. Scale bar = 20 μm.

**A**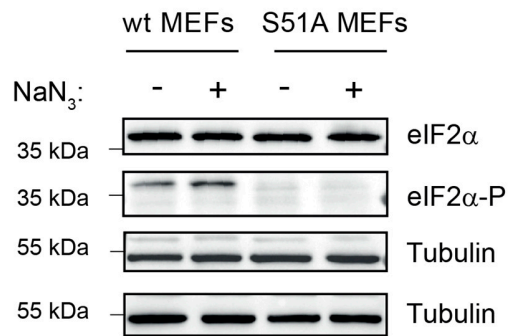**B**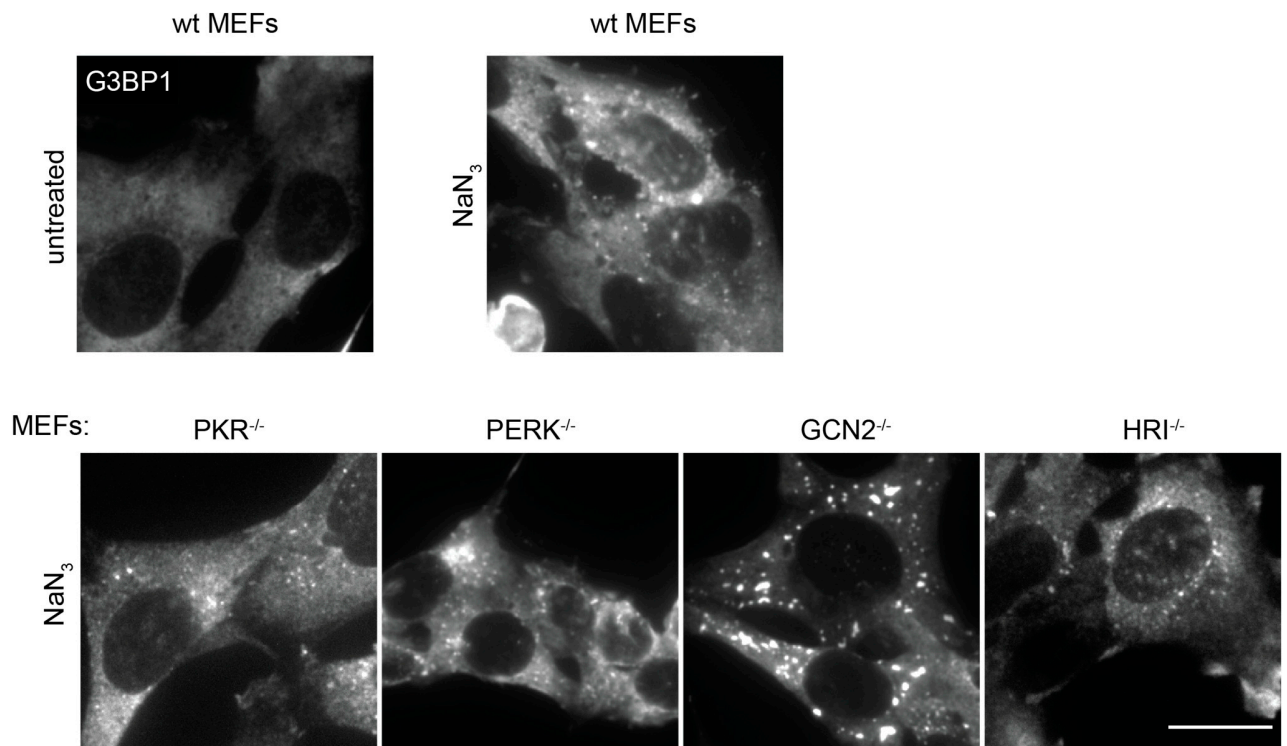

**Figure S4.** eIF2a kinases do not mediate SG formation upon exposure to NaN<sub>3</sub>. **A**, S51A and wt MEFs were treated with NaN<sub>3</sub> (76 mM) for 1h or left untreated, lysed and analyzed for the presence of eIF2α phosphorylation using WB. **B**, Different MEF mutants, deficient for the individual stress kinases, were treated with NaN<sub>3</sub> (76 mM), fixed and prepared for IF. Subcellular localization of G3BP1 was used for detection of SGs. Scale bar = 20 μm.
